# Supplementary material for: TSC–mTOR maintains quiescence and function of hematopoietic stem cells by repressing mitochondrial biogenesis and reactive oxygen species
Source: PubMed Central journal article supplement — J Exp Med. 2008 Sep 29;205(10):2397–408. doi: 10.1084/jem.20081297 (PMC2556783; doi:10.1084/jem.20081297), 2008-09-29
Supplement: jem.20081297_2.pdf [file jem.20081297_2.pdf]

**Table S1.** CFU assay of WBM and splenocytes from WT or KO mice

| Sources | Genotype                                 | GEMM           | GM           | G           | M            | E         | U          | Total       |
|---------|------------------------------------------|----------------|--------------|-------------|--------------|-----------|------------|-------------|
| BM      | Tsc1 <sup>fl/fl</sup>                    | 29.2 ± 5.6     | 229.2 ± 56.3 | 37.5 ± 6.4  | 50 ± 12.8    | 4.2 ± 1.3 | 0 ± 0      | 350 ± 45.3  |
|         | Tsc1 <sup>fl/fl</sup> ; Cre <sup>+</sup> | 116.7 ± 13.7** | 179.2 ± 41.2 | 29.2 ± 11.2 | 150 ± 35.1** | 8.3 ± 3.6 | 16.7 ± 8.6 | 500 ± 86.3* |
| Spleen  | Tsc1 <sup>fl/fl</sup>                    | 0 ± 0          | 5.8 ± 3.2    | 0 ± 0       | 5.8 ± 3.2    | 0 ± 0     | 0 ± 0      | 11.7 ± 6.5  |
|         | Tsc1 <sup>fl/fl</sup> ; Cre <sup>+</sup> | 5 ± 2.3**      | 24.2 ± 11.5  | 0.8 ± 0.6   | 18.3 ± 6.1*  | 0 ± 0     | 1.7 ± 1.2  | 50 ± 12.4** |

Cells were harvested 10 d after plpC treatments and cultured in MethoCult GFM3434 medium for 12 d. The colonies were counted under a microscope based on their morphology. The numbers of colonies presented are mean and SEs of four independent experiments, normalized for every 100,000 cells. \*, P < 0.05; \*\*, P < 0.01. E, erythroid; G, granulocyte; GEMM, granulocyte erythroid macrophage and megakaryocyte; GM, granulocyte and macrophage; M, macrophage; U, unidentified.
